# Supplementary material for: Green light-responsive photoelectrochemical sensing nanoplatform based on copper cobaltite nanorods for ultrasensitive detection of furazolidone antibiotic residue in food samples
Source: Royal Society of Chemistry journal article supplement (doi:10.1039/d4ra08497g), 2025-01-01
Supplement: d4ra08497g1.pdf [file d4ra08497g1.pdf]

Supporting information for

**Green light-responsive photoelectrochemical sensing nanoplatform based on  
copper cobaltite nanorods for ultrasensitive detection of furazolidone  
antibiotic residue in food samples**

Nguyen Ngoc Huyen<sup>1,\*</sup>, Ngo Xuan Dinh<sup>1</sup>, Vu Thi Huong Mai<sup>1</sup>, Phung Thi Lan Huong<sup>1</sup>,  
Pham Duc Thang<sup>2</sup>, Anh-Tuan Le<sup>\*\*1,3</sup>

(1) Phenikaa University Nano Institute (PHENA), PHENIKAA University, Hanoi 12116, Vietnam.

(2) Faculty of Physics, VNU Hanoi University of Science, Vietnam National University, Hanoi 11416,  
Vietnam

(3) Faculty of Materials Science and Engineering, PHENIKAA University, Hanoi 12116, Vietnam.

Corresponding authors:

[\\*huyen.nguyennhoc@phenikaa-uni.edu.vn](mailto:huyen.nguyennhoc@phenikaa-uni.edu.vn) (N. N. Huyen)

[\\*\\*tuan.leanh@phenikaa-uni.edu.vn](mailto:tuan.leanh@phenikaa-uni.edu.vn) (A.-T. Le)

## Content

### S1. Supplemental Results and Discussions

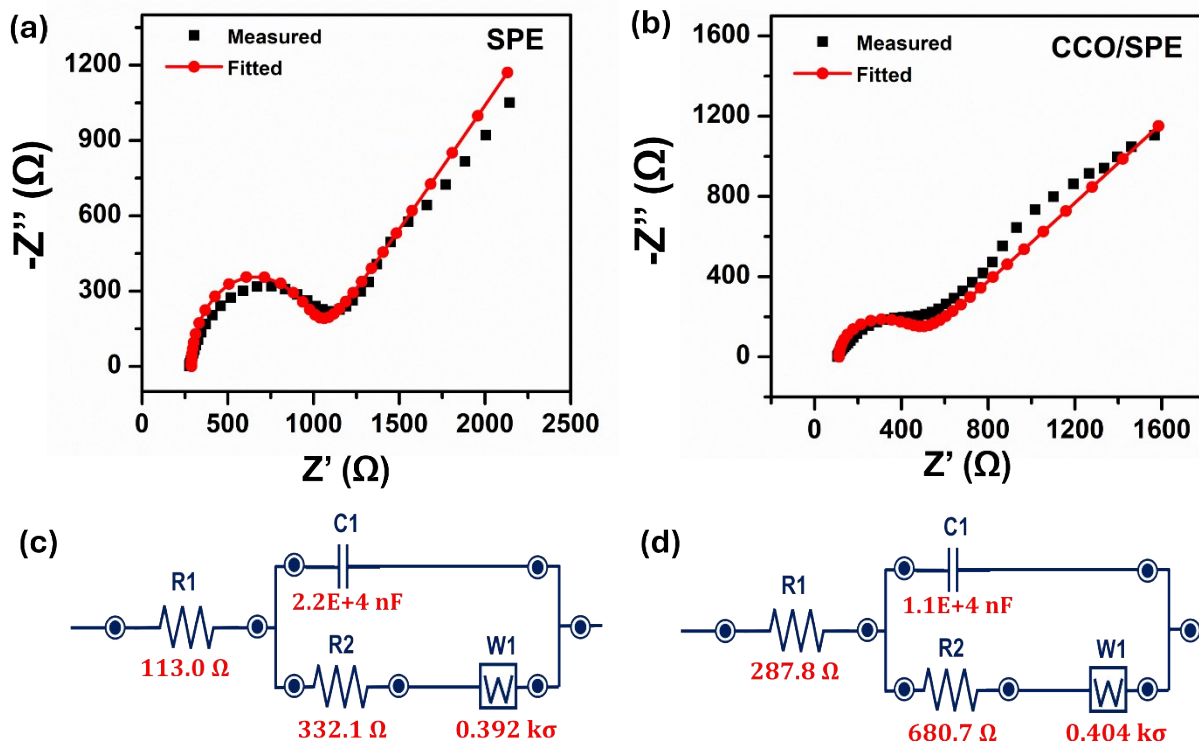

**Figure S1.** (a - b) Experimental and fitted Nyquist plots of impedance spectra corresponding in the frequency range from 0.01 Hz to 50 kHz of bare SPE, and CCO/SPE. (c -d) The Randles equivalent circuit used for fitting the data.

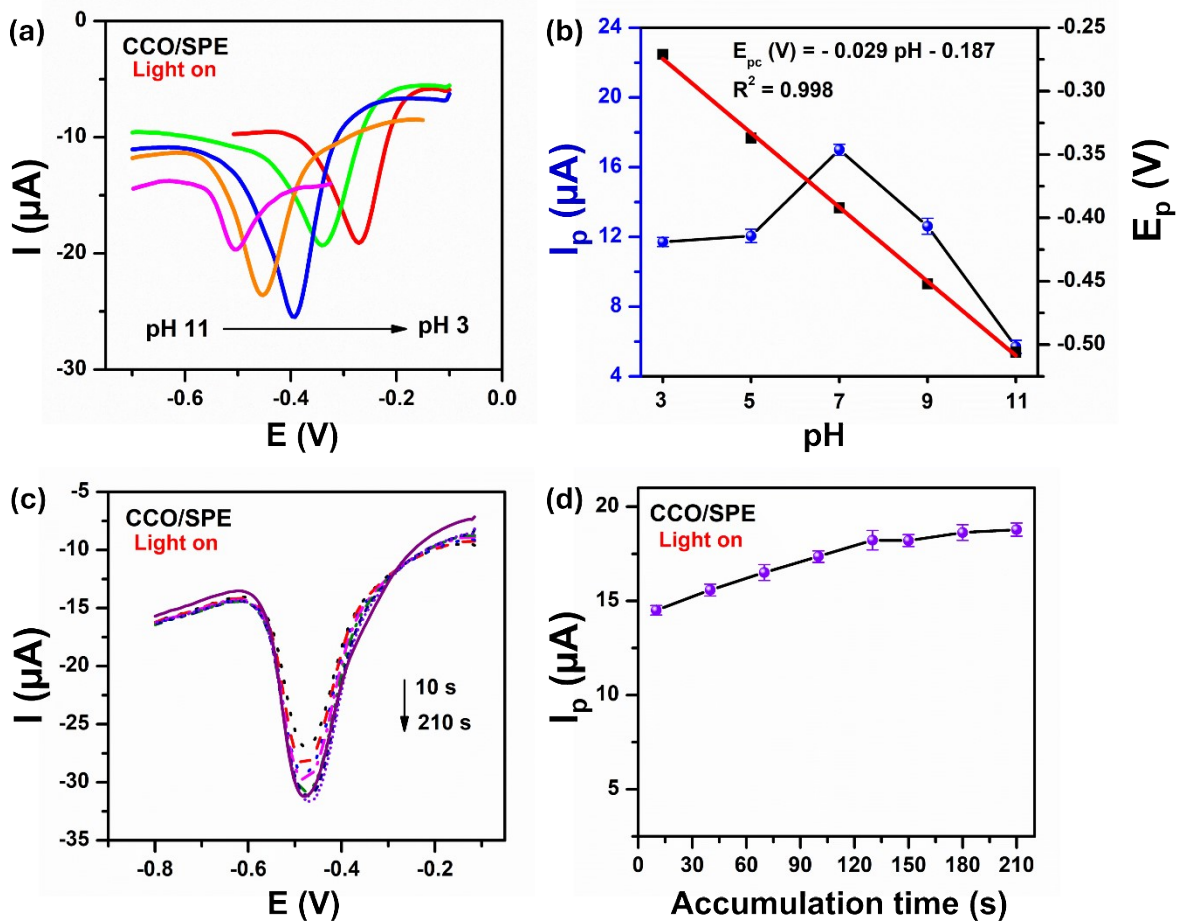

**Figure S2.** (a) DPV voltammograms of CCO/SPE in 200  $\mu\text{M}$  FZD at different pH values from 3.0 to 11.0; (b) the corresponding calibration plots of electro-reduction peak current and  $E_{pc}$  of FZD against pH values with error bars, (c) DPV curves of CCO/SPE in 200  $\mu\text{M}$  FZD at various accumulation time values, and (d) current response with accumulation time values from DPV measurements.

**Table S1.** A comparison of the electrochemical performance of different modified electrodes toward FZD detection.

| Electrode                                                                   | Technique | Linear range ( $\mu\text{M}$ ) | LOD ( $\mu\text{M}$ ) | Sensitivity ( $\mu\text{A } \mu\text{M}^{-1} \text{ cm}^{-2}$ ) | Real samples    | Ref.      |
|-----------------------------------------------------------------------------|-----------|--------------------------------|-----------------------|-----------------------------------------------------------------|-----------------|-----------|
| ZnFe <sub>2</sub> O <sub>4</sub> /SPE                                       | DPV       | 0.5 - 75                       | 0.61                  | 0.56                                                            | Milk            | 1         |
| ZnO/ZnFe <sub>2</sub> O <sub>4</sub> /SPE                                   | DPV       | 0.5 - 75                       | 0.41                  | 0.70                                                            |                 |           |
| ZnO/ZnFe <sub>2</sub> O <sub>4</sub> /SPE                                   | DPV       | 1 - 100                        | 0.65                  | 0.76                                                            | Pork and shrimp | 2         |
| GO/SPE                                                                      | LSV       | 1 - 100                        | 0.19                  | 1.03                                                            | -               | 3         |
| Ag@Fe <sub>3</sub> O <sub>4</sub> /SPE                                      | DPV       | 0.5 - 100                      | 0.24                  | 1.36                                                            | Honey and milk  | 4         |
| NiFe <sub>2</sub> O <sub>4</sub> /rGO/GCE                                   | DPV       | 0.1 - 150                      | 0.05                  | -                                                               | Plasma, urine   | 5         |
| CuCo <sub>2</sub> O <sub>4</sub> /SPE<br>(Without green light illumination) | DPV       | 0.5 - 200                      | 0.09                  | 0.93                                                            | -               | This work |
| CuCo <sub>2</sub> O <sub>4</sub> /SPE<br>(With green light illumination)    | DPV       | 0.25 -200                      | 0.03                  | 1.11                                                            | Honey and milk  |           |

**LOD:** Limit of detection; **SPE:** Screen-printed electrode; **DPV:** Differential pulse voltammetry; **GO:** Graphene oxide; **LSV:** Linear sweep voltammetry; **rGO:** Reduced graphene oxide; **GCE:** Glassy carbon electrode;

## Reference

1. N. N. Huyen, N. T. Anh, T. L. H. Phung, N. X. Dinh, N. T. Vinh, T. T. Loan, D. L. Vu and A.-T. Le, Boosting the Selective Electrochemical Signals for Simultaneous Determination of Chloramphenicol and Furazolidone in Food Samples by Using  $\text{ZnFe}_2\text{O}_4$ -Based Sensing Platform: Correlation between Analyte Molecular Structure and Electronic Property of Electrode Materials, *J. Electrochem. Soc.*, 2022, **169**, 106517.
2. N. T. Anh, N. N. Huyen, N. X. Dinh, N. T. Vinh, N. Van Quy, V. D. Lam and A.-T. Le,  $\text{ZnO}/\text{ZnFe}_2\text{O}_4$  nanocomposite-based electrochemical nanosensors for the detection of furazolidone in pork and shrimp samples: exploring the role of crystallinity, phase ratio, and heterojunction formation, *New J. Chem.*, 2022, **46**, 7090-7102.
3. D. T. N. Nga, N. L. N. Trang, V.-T. Hoang, X.-D. Ngo, P. T. Nhung, D. Q. Tri, N. D. Cuong, P. A. Tuan, T. Q. Huy and A.-T. Le, Elucidating the roles of oxygen functional groups and defect density of electrochemically exfoliated GO on the kinetic parameters towards furazolidone detection, *RSC Adv.*, 2022, **12**, 27855-27867.
4. N. T. Anh, N. X. Dinh, N. N. Huyen, P. T. L. Huong, V. N. Phan, P. D. Thang, H. Van Tuan, T. Van Tan and A.-T. Le, Promoting electron transfer kinetics and adsorption capacity for the detection of furazolidone in real food samples by using ag-core@ $\text{Fe}_3\text{O}_4$ -shell-based electrochemical sensing platform, *J. Electrochem. Soc.*, 2023, **170**, 017510.
5. A. A. Ensafi, N. Zandi-Atashbar, M. Gorgabi-Khorzoughi and B. Rezaei, Nickel-ferrite oxide decorated on reduced graphene oxide, an efficient and selective electrochemical sensor for detection of furazolidone, *IEEE Sens. J.*, 2019, **19**, 5396-5403.
